# Supplementary material
Source: PubMed Central journal article supplement (PMC2875167)
Supplement: NIHMS4552-supplement-1.pdf [file NIHMS4552-supplement-1.pdf]

### 3' uridylation precedes decapping in a novel pathway of bulk mRNA turnover

Olivia S. Rissland and Chris J. Norbury

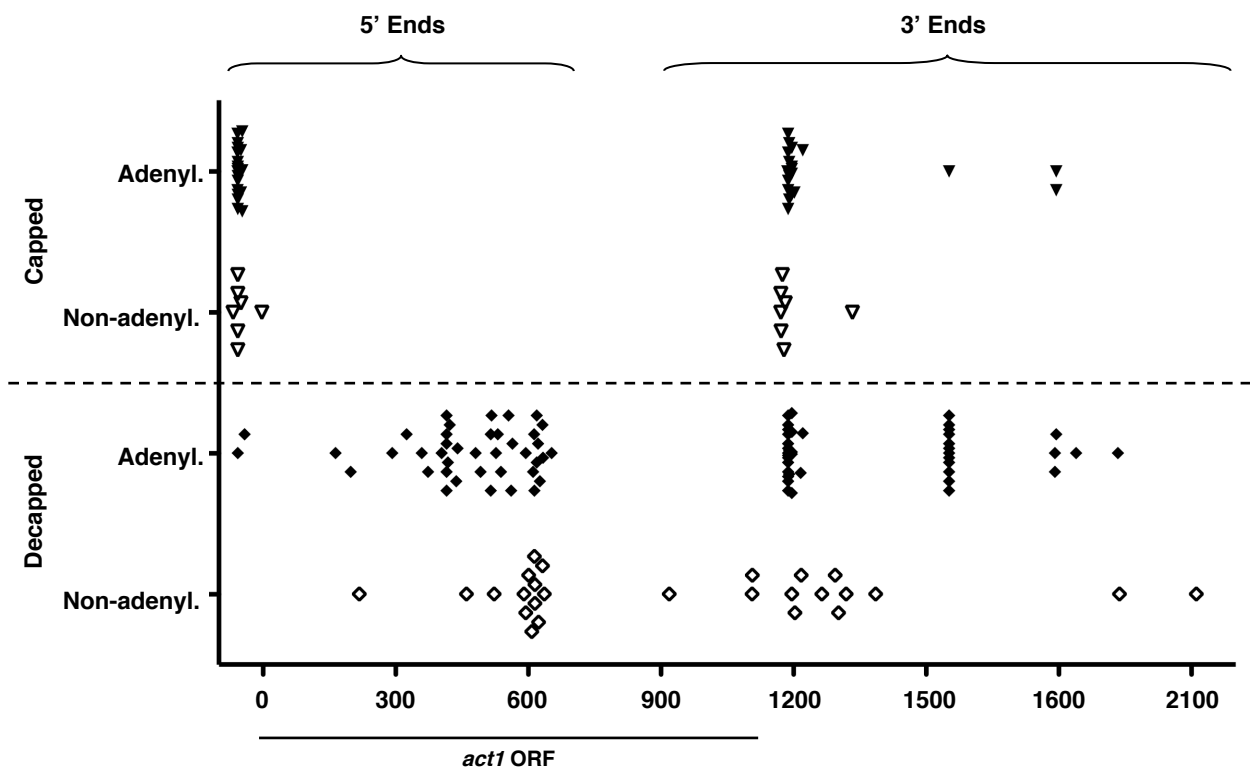

**Supplementary Figure 1.** *act1* cRACE sequences from WT cells. The 5' and 3' ends of various types of *act1* cRACE sequences are plotted as the distance (in nt, as indicated on the horizontal axis) from the start codon. The open reading frame (ORF) is marked with a line.

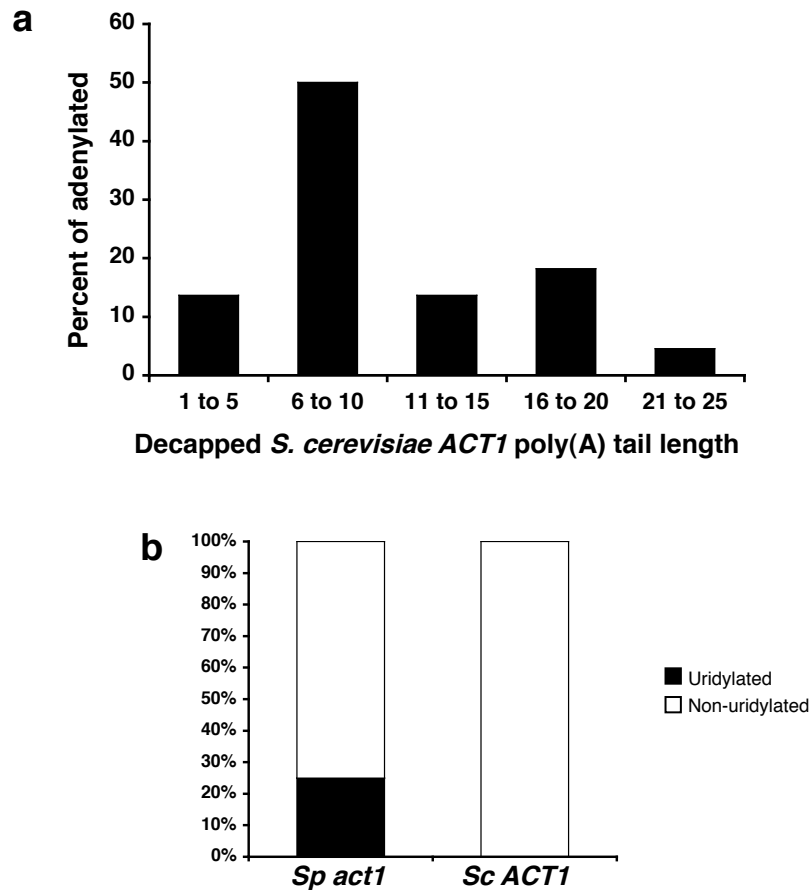

**Supplementary Figure 2.** In *S. cerevisiae*, *ACT1* mRNA is degraded by deadenylation-dependent mechanisms. **(a)** Poly(A) tail lengths of decapped *S. cerevisiae* *ACT1* messages were binned into groups of ten nt. Tail lengths were then plotted as percentage of adenylated species. **(b)** The percentage of decapped, adenylated transcripts that contain [in black] or lack [in white] a terminal uridylyl residue is plotted for *act1* messages isolated from *S. pombe* (n=40) or *S. cerevisiae* cells (n=22).

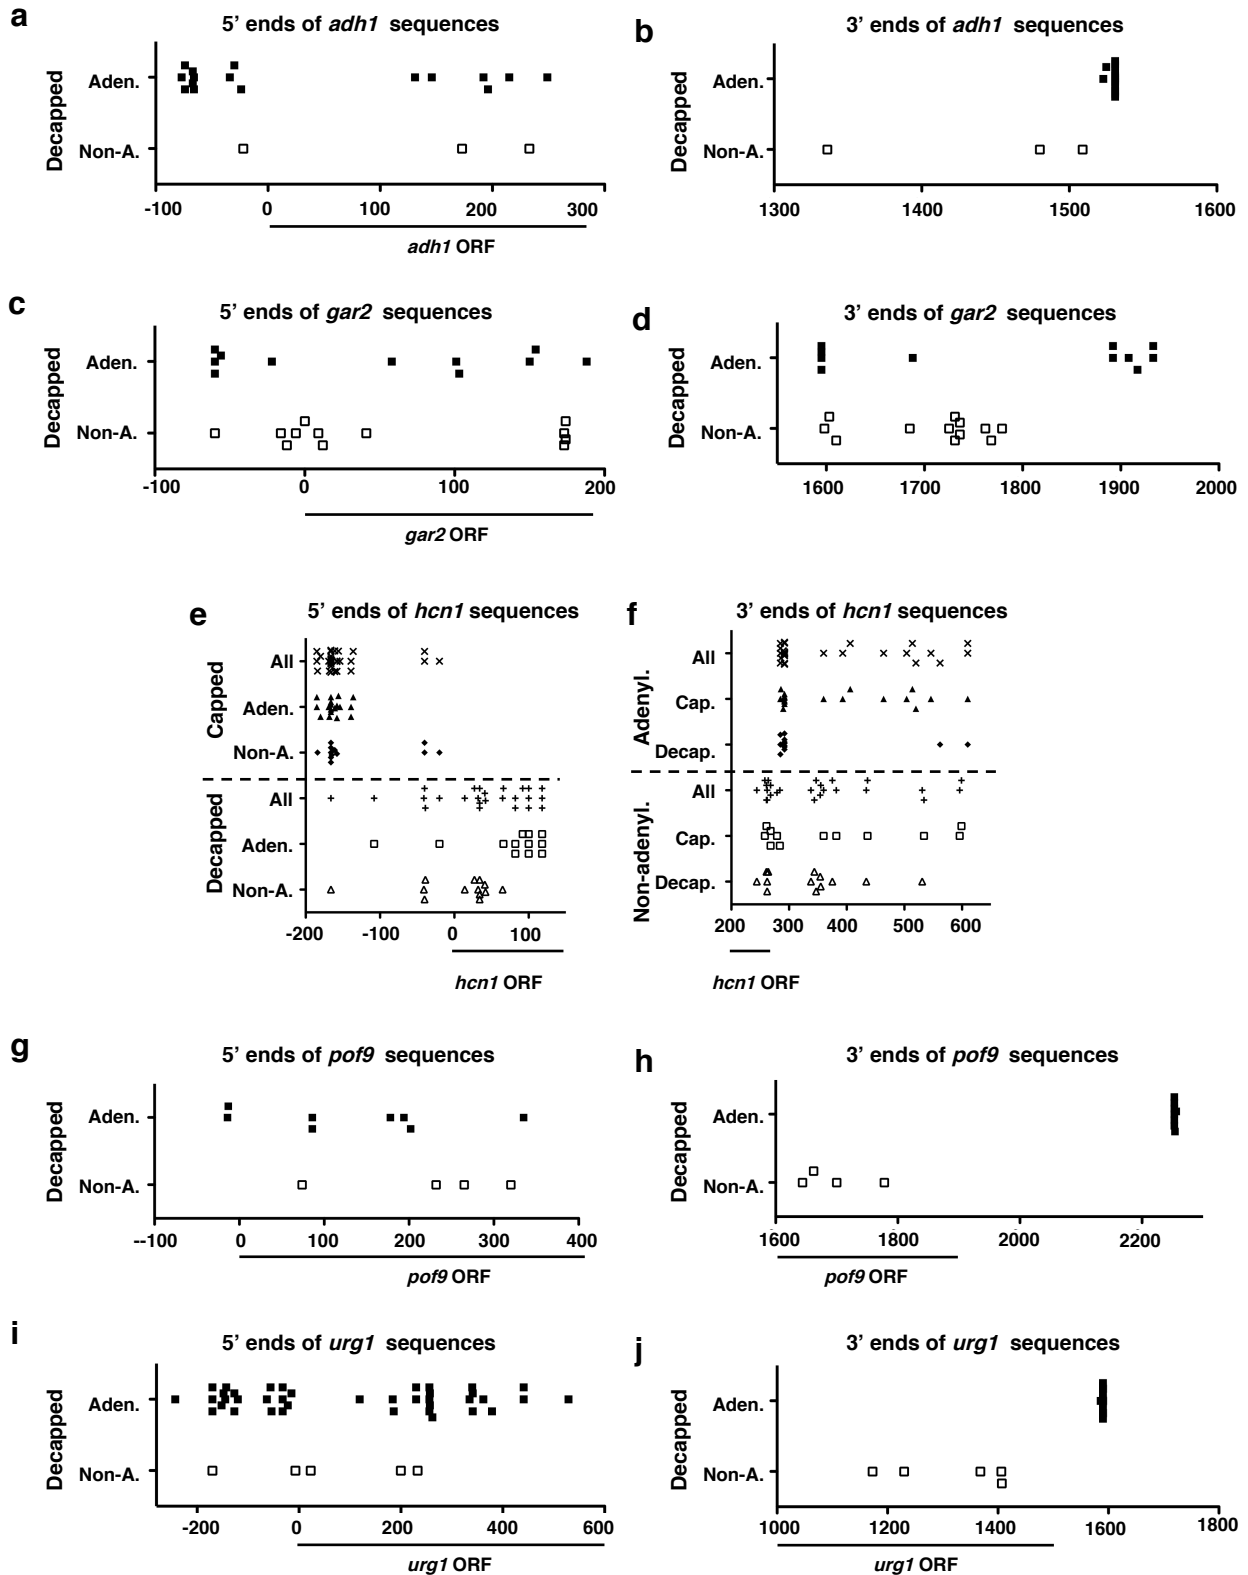

**Supplementary Figure 3.** *adh1*, *gar2*, *hcn1*, *pof9* and *urg1* cRACE sequences from WT cells. The 5' and 3' ends of various types of *adh1* (a,b), *gar2* (c, d), *hcn1* (e, f), *pof9* (g, h) and *urg1* (i, j) cRACE sequences are plotted as the distance (in nt, as indicated on the horizontal axis) from the start codon. Where appropriate, the open reading frame (ORF) is marked with a line.

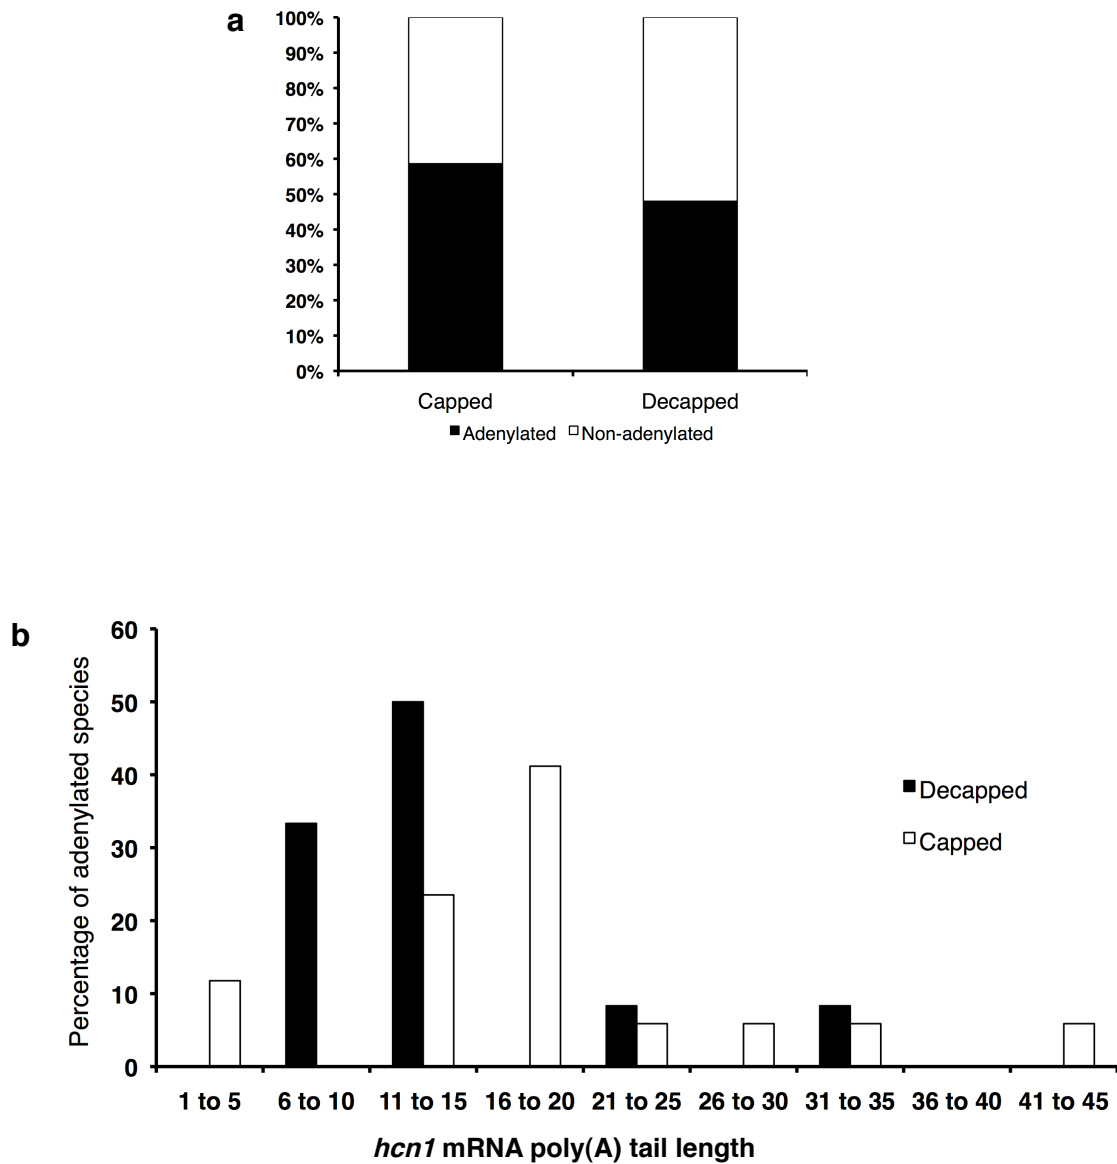

**Supplementary Figure 4.** *hcn1* mRNA is degraded mainly by deadenylation-dependent decay. **(a)** The percentage of adenylated [black] and nonadenylated [white] sequences for capped (n=18) and decapped (n=12) *hcn1* transcripts is shown. **(b)** Poly(A) tail lengths of decapped [black] and capped [white] sequences were binned into groups of five nt. Tail lengths were then plotted as percentage of adenylated species.

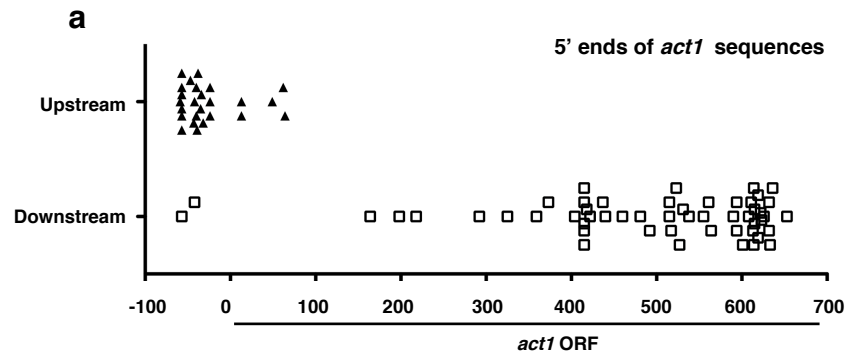

**b**

| Strain       | Primer Location | Number Uridylated | Total | Percentage Uridylated |
|--------------|-----------------|-------------------|-------|-----------------------|
| Wild-type    | Downstream      | 10                | 40    | 25.0%                 |
|              | Upstream        | 3                 | 14    | 21.5%                 |
| <i>ski2Δ</i> | Downstream      | 5                 | 18    | 27.8%                 |

**Supplementary Figure 5.** Uridylation precedes extensive 5' – 3' mRNA degradation. **(a)** The 5' ends of *act1* cRACE sequences, generated from either the upstream or downstream primer, are plotted as the distance (in nt, as indicated on the horizontal axis) from the start codon. The open reading frame (ORF) is marked with a line. **(b)** The percentages of uridylated sequences in cRACE products generated using the downstream (n=40) and upstream (n=14) *act1* primers are shown, as well as that observed in *ski2Δ* cells.

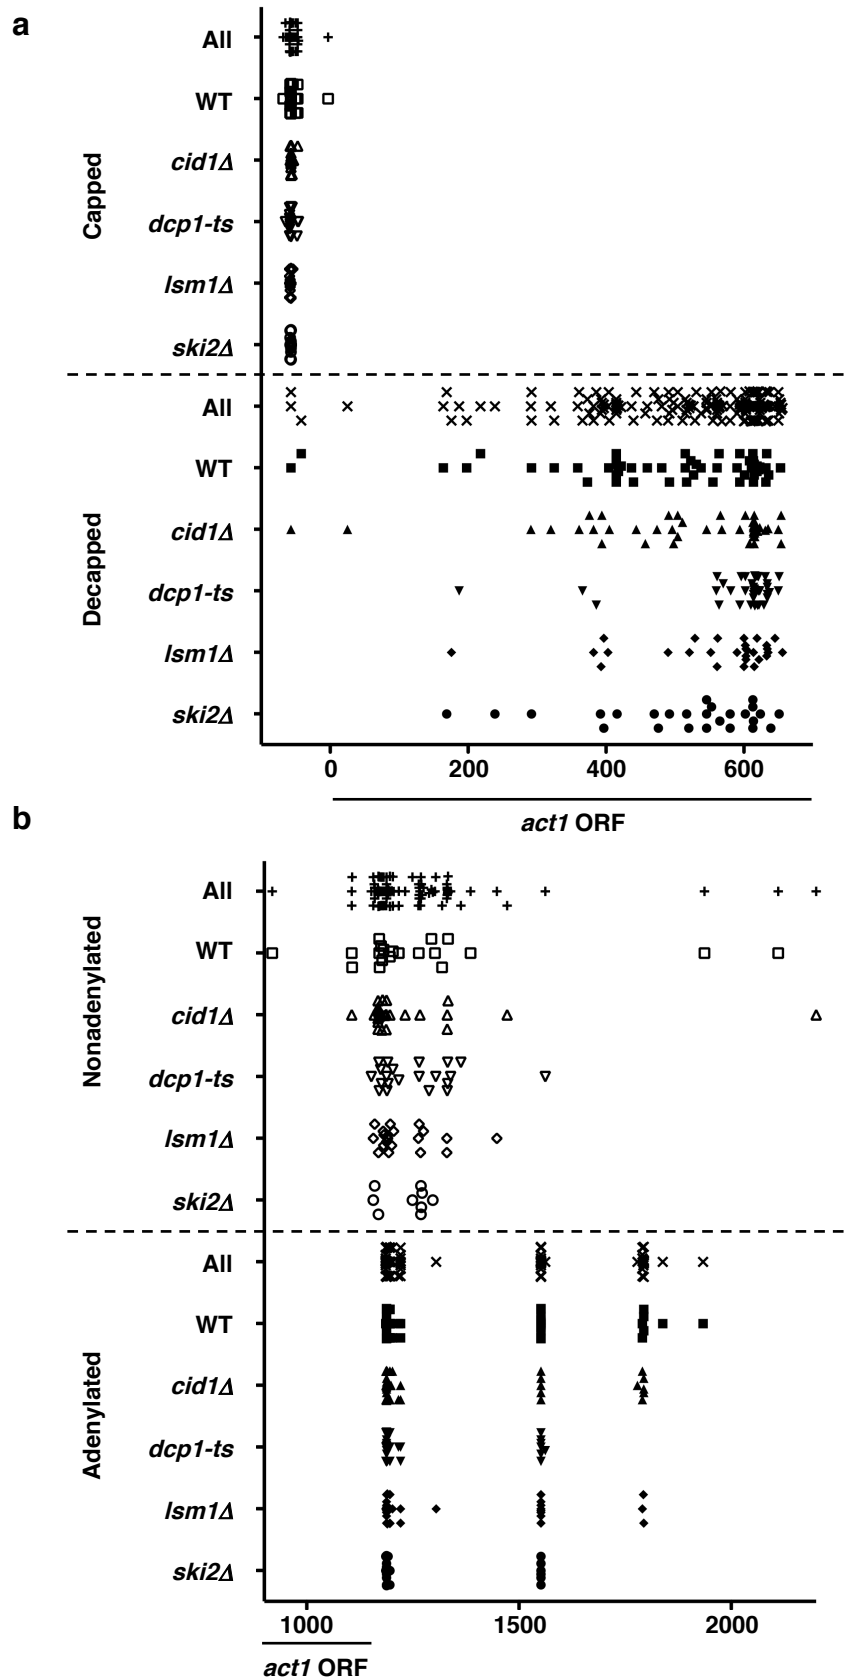

**Supplementary Figure 6.** *act1* cRACE products from various strains. The 5' (**a**) and 3' (**b**) ends of various types of *act1* cRACE sequences from WT, *cid1*Δ, *dcp1-ts*, *lsm1*Δ and *ski2*Δ are plotted as the distance (in nt, as indicated on the horizontal axis) from the start codon. The open reading frame (ORF) is marked with a line.

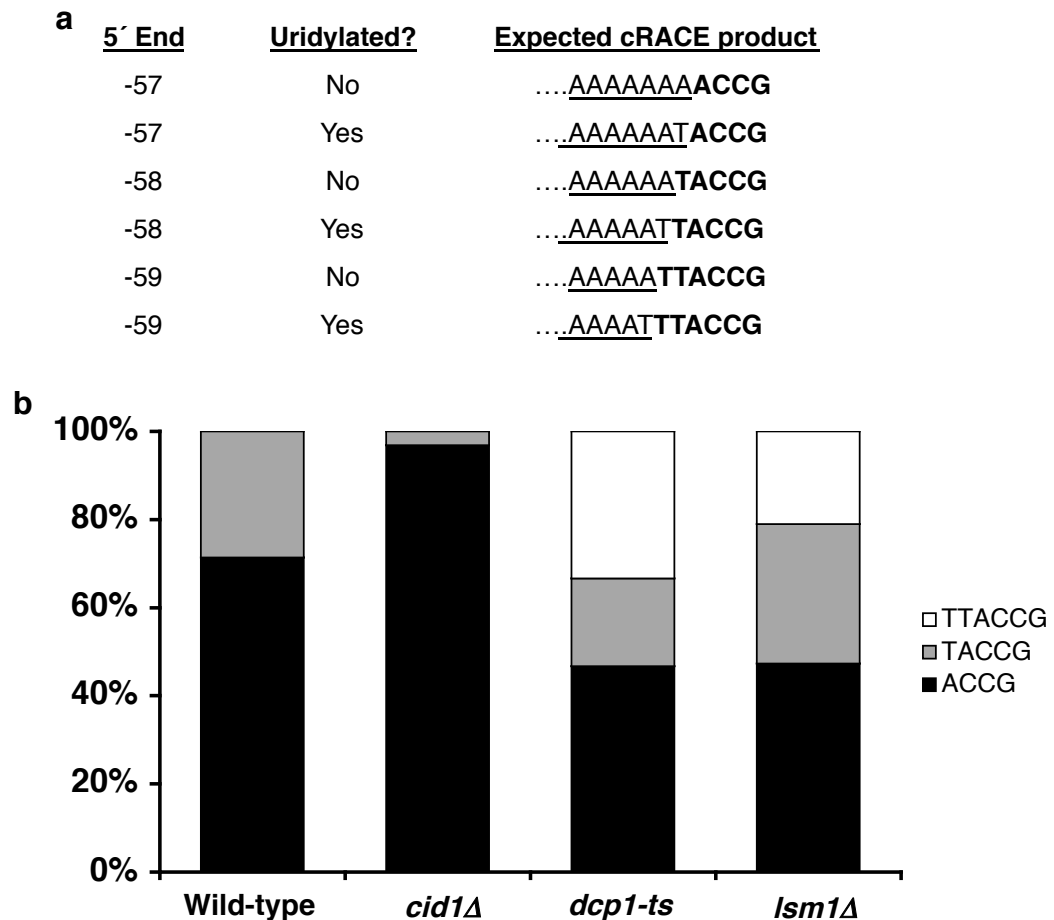

**Supplementary Figure 7.** Uridylated, capped *act1* mRNAs accumulate in *dcp1-ts* and *lsm1Δ* cells. (a) Due to the position of the most abundant transcriptional start site of *act1*, it was not possible to definitively determine whether capped mRNA was uridylated. That is, in the DNA sequence, the main start site (at  $-57$  bases) is preceded by two thymines: a capped mRNA starting at position  $-57$  and containing a terminal uridyl residue is therefore indistinguishable from a non-uridylated transcript starting at nucleotide  $-58$ . Similarly, a capped mRNA, starting at position  $-57$ , containing two terminal uridyl residues is indistinguishable from a non-uridylated transcript starting at position  $-59$ . A table of these possibilities is presented along with the expected cRACE product: nucleotides underlined denote those derived from the 3' tail; those in bold denote those derived from the 5' end. (b) If 3' terminal uridyl residues had been incorrectly assigned to the 5' end, conditions that decrease uridylation might result in an apparent shift in the transcription start site to the  $-57$  position and those that increase might result in an apparent shift to the  $-58$  and  $-59$  positions. Of those transcripts appearing to initiate at the  $-57$ ,  $-58$  or  $-59$  positions, the percentage of these sites is plotted [ $-59$  position or TTACCG in white;  $-58$  position or TACCG in grey;  $-57$  or ACCG in black] for capped *act1* transcripts isolated from WT cells (14 samples), *cid1Δ* cells (32 samples), *dcp1-ts* cells (15 samples) or *lsm1Δ* cells (19 samples). Consistent with this interpretation, there was a significant, apparent shift to the  $-57$  position in *cid1Δ* cells when compared with WT cells ( $p=0.005$ ). In *dcp1-ts* and *lsm1Δ* cells, there was a significant, apparent shift in start site usage to the  $-58$  and  $-59$  positions in comparison to WT cells ( $p=0.02$  and  $p=0.03$ , respectively).

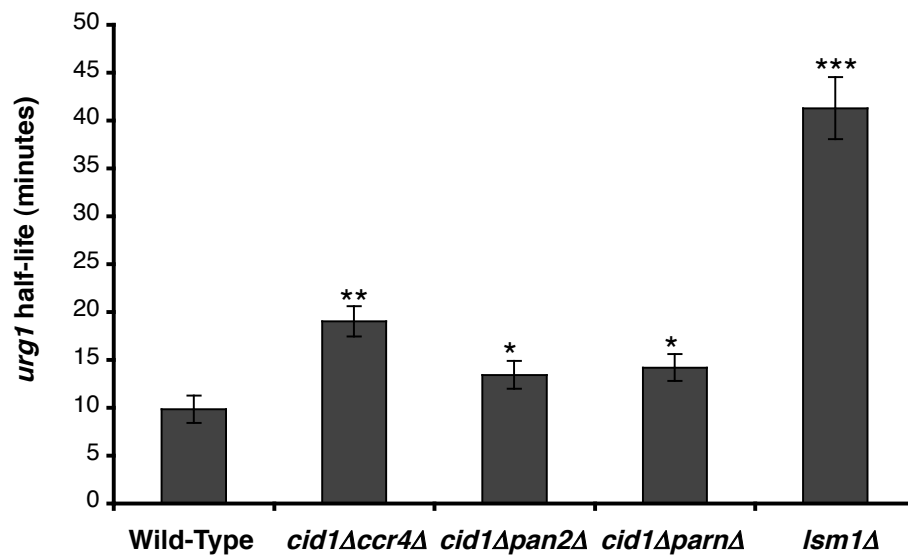

**Supplementary Figure 8.** *urg1* mRNA is stabilized in *cid1Δccr4Δ*, *cid1Δpan2Δ*, *cid1ΔparnΔ* and *lsm1Δ* cells. Cells were harvested at 0, 10, 20 and 30 minutes after uracil washout. After probing for *urg1* and *pik1* by northern blotting, *urg1* levels were normalized to *pik1* mRNA. The percent of *urg1* remaining at each time point was calculated by a comparison to the normalized amount at 0 minutes. The half-life of *urg1* in different strains is shown. At least two independent replicates were performed for each strain. \* denotes  $p < 0.05$ ; \*\* denotes  $p < 0.001$ ; \*\*\* denotes  $p < 0.0005$ . Error bars represent standard deviation.



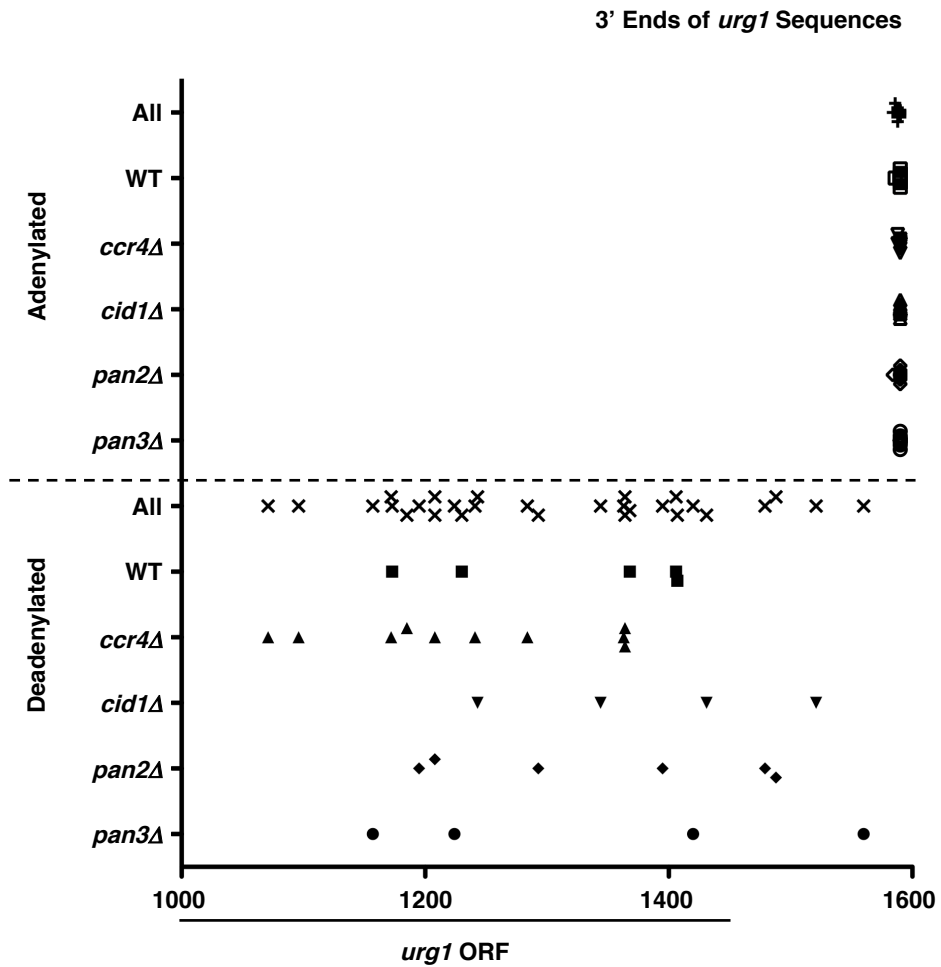

**Supplementary Figure 9.** *urg1* cRACE sequences from various strains. The 3' ends of various types of *urg1* cRACE sequences from WT, *ccr4*Δ, *cid1*Δ, *pan2*Δ and *pan3*Δ are plotted as the distance (in nt, as indicated on the horizontal axis) from the start codon. The open reading frame (ORF) is marked with a line.

**Supplementary Table 1. *act1* HSC-RACE products from wild-type cells.**

| <b>Clone</b> | <b>3' End</b>           | <b>Tail</b>                         |
|--------------|-------------------------|-------------------------------------|
| ASC01        | ...TCTTCTGATATA (+1190) | (A) <sub>13</sub>                   |
| ASC02        | ...ATTCTTCTGATA (+1188) | (A) <sub>17</sub> U                 |
| ASC03        | ...ATTCTTCTGATA (+1188) | (A) <sub>21</sub>                   |
| ASC04        | ...ATATATATAAA (+1196)  | (A) <sub>27</sub> G(A) <sub>8</sub> |
| ASC05        | ...ATTCTTCTGATA (+1188) | (A) <sub>35</sub>                   |
| ASC13        | ...CGATTCTTCTGA (+1186) | (A) <sub>19</sub>                   |
| ASC15        | ...TCTTCTGATATA (+1190) | (A) <sub>15</sub>                   |
| ASC16        | ...TCTTCTGATATA (+1190) | (A) <sub>25</sub> U                 |
| ASC17        | ...ATTCTTCTGATA (+1188) | (A) <sub>16</sub>                   |
| ASC19        | ...ATTCTTCTGATA (+1188) | (A) <sub>12</sub> GA                |
| ASC20        | ...ATTCTTCTGATA (+1188) | (A) <sub>30</sub>                   |
| ASC21        | ...ATTCTTCTGATA (+1188) | (A) <sub>11</sub> UCA               |
| ASC22        | ...ATTCTTCTGATA (+1188) | (A) <sub>7</sub>                    |
| ASC24        | ...TGAGGAACTTTG (+1260) | No Tail                             |
| ASC25        | ...CGATTCTTCTGA (+1186) | (A) <sub>14</sub>                   |
| ASC26        | ...ATTCTTCTGATA (+1188) | (A) <sub>18</sub> U                 |
| ASC27        | ...TCTTCTGATATA (+1190) | (A) <sub>13</sub>                   |
| ASC28        | ...ATTCAATCTTT (+1211)  | No Tail                             |
| ASC30        | ...ATTCTTCTGATA (+1188) | (A) <sub>38</sub>                   |
| ASC31        | ...TCTTCTGATATA (+1190) | (A) <sub>28</sub>                   |
| ASC34        | ...ATATATATAAA (+1196)  | C(A) <sub>36</sub>                  |

**Supplementary Table 2. *act1* HSC-RACE products from *dcp1-ts* cells.**

| <b>Clone</b> | <b>3' End</b>            | <b>Tail</b>                          |
|--------------|--------------------------|--------------------------------------|
| AdSC01       | ...TTTGTAACGTTT (+1152)  | No Tail                              |
| AdSC02       | ...ACATACTTTTGA (+1167)  | No Tail                              |
| AdSC03       | ...ATATATATAAA (+1196)   | (A) <sub>5</sub> U                   |
| AdSC04       | ...ATTCTTCTGATA (+1188)  | (A) <sub>13</sub> UU                 |
| AdSC05       | ...GTAACGTTTTTT (+1155)  | No Tail                              |
| AdSC06       | ...TTCAATCTTTTT (+1209)  | No Tail                              |
| AdSC07       | ...ATTCTTCTGATA (+1188)  | (A) <sub>14</sub> UU                 |
| AdSC08       | ...TCTTCTGATATA (+1190)  | (A) <sub>4</sub> U                   |
| AdSC09       | ...ACTTTTTTGATTC (+1148) | No Tail                              |
| AdSC10       | ...ATTCTTCTGATA (+1188)  | (A) <sub>20</sub>                    |
| AdSC14       | ...CGATTCTTCTGA (+1186)  | (A) <sub>14</sub> U                  |
| AdSC15       | ...TATAAATTTCAA (+1202)  | (A) <sub>26</sub>                    |
| AdSC16       | ...ATATATATAAA (+1196)   | (A) <sub>6</sub> UU                  |
| AdSC17       | ...CGATTCTTCTGA (+1188)  | (A) <sub>12</sub> U                  |
| AdSC18       | ...CGATTCTTCTGA (+1186)  | (A) <sub>18</sub>                    |
| AdSC19       | ...TTCAATCTTTTT (+1209)  | No Tail                              |
| AdSC20       | ...TATAAATTTCAA (+1202)  | (A) <sub>26</sub>                    |
| AdSC21       | ...ATATATATAAA (+1196)   | (A) <sub>8</sub> UU                  |
| AdSC22       | ...CGATTCTTCTGA (+1188)  | (A) <sub>8</sub> (U) <sub>4</sub>    |
| AdSC23       | ...ATATATATAAA (+1196)   | (A) <sub>7</sub> U                   |
| AdSC25       | ...CGATTCTTCTGA (+1188)  | (A) <sub>10</sub> UU                 |
| AdSC26       | ...ATATATATAAA (+1196)   | (A) <sub>8</sub> U                   |
| AdSC27       | ...CGATTCTTCTGA (+1188)  | (A) <sub>11</sub> U                  |
| AdSC28       | ...TTCAATCTTTTT (+1209)  | No Tail                              |
| AdSC29       | ...TATAAATTTCAA (+1202)  | (A) <sub>7</sub>                     |
| AdSC30       | ...TTCTGATATATA (+1190)  | (A) <sub>10</sub> UC(U) <sub>4</sub> |
| AdSC31       | ...TCTTCTGATATA (+1190)  | (A) <sub>19</sub>                    |

**Supplementary Table 3. Oligonucleotides used in this study.**

| <i>Name</i>          | <i>Sequence (5' to 3')</i>                | <i>Use</i>                                                      |
|----------------------|-------------------------------------------|-----------------------------------------------------------------|
| M13 Reverse Primer   | CAGGAAACAGCTATGAC                         | Sequencing                                                      |
| M13 Forward Primer   | GTA AACGACGGCCAG                          | Sequencing                                                      |
| 5' T7 Actin          | TAATACGACTCACTATAGGGAGGAAAAGTAGAAAAGAGAAG | HSC-RACE RNA probe;<br>cRACE 1 <sup>st</sup> PCR primer         |
| 3' T7 Actin          | CCACTATGTATCCC GGTATTGC                   | HSC-RACE RNA probe                                              |
| RNase H Actin        | CTCATCATACTCTTGCTTGG                      | HSC-RACE                                                        |
| Seq Actin            | GCTCCTCTTACTTTTTGTAACG                    | HSC-RACE; cRACE 2 <sup>nd</sup> PCR primer                      |
| RT Actin             | GAAGCACTTACGGTAAACGATAC                   | HSC-RACE                                                        |
| Upstream 5' T7 Actin | TAATAGACTCACTATAGGGACTCAAAGTCCAAAGCGAC    | cRACE RT primer                                                 |
| HCN1 RT 1            | CCAATCCTTCTTTCAC                          | cRACE RT, 1 <sup>st</sup> PCR primer                            |
| HCN1 RT 2            | CTTTTCAGGCGATAAAC                         | cRACE 2 <sup>nd</sup> PCR primer                                |
| HCN1 PCR 1           | CTTCAATGCATCCTTCCC                        | cRACE RT, 1 <sup>st</sup> PCR primer                            |
| HCN1 PCR 2           | GGTGGAGCCGCTCAATCATAG                     | cRACE 2 <sup>nd</sup> PCR primer                                |
| Urg1 RT 2            | CGGCAACAGCTAAAGC                          | cRACE 2 <sup>nd</sup> PCR primer                                |
| Urg1 RT 1            | GGTGGGACGAACGTCG                          | cRACE 1 <sup>st</sup> PCR primer;<br>Northern blot probe primer |
| Urg1 PCR 1           | CA AATACCTTGT TTACAAC                     | cRACE 1 <sup>st</sup> PCR primer                                |
| Urg1 PCR 2           | GAAGAGTTGGCCGGTGTTCCG                     | cRACE 2 <sup>nd</sup> PCR primer                                |
| Actin cRACE Upstream | GAGGGGAATACAGCTCTAG                       | Upstream cRACE primer                                           |
| Sc Act1 RT1          | CGTTGTAGAAGGTATGATGCCAGATC                | cRACE RT, 1 <sup>st</sup> PCR primer                            |
| Sc Act1 RT2          | CCAGTTGGTGACAATACCGTGTTCC                 | cRACE 2 <sup>nd</sup> PCR primer                                |
| Sc Act1 PCR1         | GTGATGTCGATGTCCGTAAGG                     | cRACE 1 <sup>st</sup> PCR primer                                |
| Sc Act1 PCR2         | GGTGGTACCACCATGTTCCCAGG                   | cRACE 2 <sup>nd</sup> PCR primer                                |
| adh1 RT 2            | GGTCACCAATCTTAAGACG                       | cRACE 2 <sup>nd</sup> PCR primer                                |
| adh1 RT 1            | CAGTACTCGCAGTTACCGC                       | cRACE 1 <sup>st</sup> PCR primer                                |
| adh1 PCR 1           | GATCCACTTTTAATTCCTAATG                    | cRACE 1 <sup>st</sup> PCR primer                                |
| adh1 PCR 2           | CTTTTACCATTTCCACCACAC                     | cRACE 2 <sup>nd</sup> PCR primer                                |

|                |                                                                                                        |                                  |
|----------------|--------------------------------------------------------------------------------------------------------|----------------------------------|
| gar2 RT 2      | GATTTCTTTGAAGGTTCCGGG                                                                                  | cRACE 2 <sup>nd</sup> PCR primer |
| gar2 RT 1      | CTTCCTTCTTCTTAGATTC                                                                                    | cRACE 1 <sup>st</sup> PCR primer |
| gar2 PCR 1     | CACTTTTGACTAAGTATACTGGC                                                                                | cRACE 1 <sup>st</sup> PCR primer |
| gar2 PCR 2     | GAGTTTGGGTTTTTGGG                                                                                      | cRACE 2 <sup>nd</sup> PCR primer |
| pof9 RT 2      | CATAACCTCCAACCTGAACC                                                                                   | cRACE 2 <sup>nd</sup> PCR primer |
| pof9 RT 1      | CAACATTGTTTGGTACCCC                                                                                    | cRACE 1 <sup>st</sup> PCR primer |
| pof9 PCR 1     | CTTTGGAAAGGGACGGC                                                                                      | cRACE 1 <sup>st</sup> PCR primer |
| pof9 PCR 2     | GGTAAGCTAATTTCCGCG                                                                                     | cRACE 2 <sup>nd</sup> PCR primer |
| Urg1 Real Time | CCCCTGATCATCGTCCC                                                                                      | Northern blot probe primer       |
| Pik1 5' N Blot | GCTGGTAAAAATGTTGTTAC                                                                                   | Northern blot probe primer       |
| Pik1 3' N Blot | TAGTAAATTCGTTCCG                                                                                       | Northern blot probe primer       |
| 5' Lsm1 Del    | GCGTTTATAAAAGAAATAGAAAGTTAAATCTAAATTAATTAT<br>TAGTTTATGCTACATCAAATAATAGCTGAAAATCCCCTGG<br>CTATATGT     | <i>lsm1</i> deletion primer      |
| 3' Lsm1 Del    | CGAGATAGCTTTCTATCGTGACTGTAACAAACGGTATAGCA<br>ATATTGTGATAAATTTGTTCAACCGTTGTAATTCTAAATGCCT<br>TCTGAC     | <i>lsm1</i> deletion primer      |
| 5' Lsm1 Check  | CACTCAAATAAAGTCATC                                                                                     | Checking <i>lsm1</i> deletion    |
| 3' Lsm1 Check  | CATTTAAAGGGGAATAAAC                                                                                    | Checking <i>lsm1</i> deletion    |
| 5' Pan3 Del    | CCTTAAAGTTGTCGAAAACCTCAATTTCAAGTGCTTCCAATA<br>AAGAGTCCGTACCCCTCACTAGGCCAAAAAATCCCCTGGC<br>TATATGT      | <i>pan3</i> deletion primer      |
| 3' Pan3 Del    | CTAAGATTATTTGAACATCGCCGTTCTAACTCCATGAACGCA<br>GTATTAATTGTGGTTTTTCACCTAGATAGTTTAATTCTAAATGC<br>CTTCTGAC | <i>pan3</i> deletion primer      |
| 5' Pan3 Check  | CAGTATAAATTCGCCATC                                                                                     | Checking <i>pan3</i> deletion    |
| 3' Pan3 Check  | GTTGCCTCAAATCGTCAG                                                                                     | Checking <i>pan3</i> deletion    |

**Supplementary Table 4. Yeast strains used in this study.**

| <b>Strain</b>                                     | <b>Genotype</b>                                                                | <b>Source</b> |
|---------------------------------------------------|--------------------------------------------------------------------------------|---------------|
| Wild-type                                         | <i>h- leu1-32</i>                                                              | Lab stock     |
| <i>ccr4Δ</i>                                      | <i>h- ccr4::kanMX leu1-32</i>                                                  | This study    |
| <i>cid1Δ</i>                                      | <i>h- cid1::ura4<sup>+</sup> leu1-32 ura4-D18</i>                              | <sup>8</sup>  |
| <i>cid1Δ</i> (for <i>urg1</i> half-life analysis) | <i>h- cid1::LEU2 leu1-32</i>                                                   | This study    |
| <i>cid1Δccr4Δ</i>                                 | <i>h? cid1::LEU2 ccr4::kanMX ade6-? leu1-32</i>                                | This study    |
| <i>cid1Δpan2Δ</i>                                 | <i>h? cid1::LEU2 pan2::kanMX ade6-? leu1-32</i>                                | This study    |
| <i>cid1ΔparnΔ</i>                                 | <i>h? cid1::LEU2 parn::hygB<sup>R</sup> ade6-? leu1-32</i>                     | This study    |
| <i>dcp1-ts</i>                                    | <i>h- dcp1::hygB<sup>R</sup> leu1::kanr-Padh1-FLAG-dcp1-L69S ura4-D18 ade6</i> | <sup>21</sup> |
| <i>ism1Δ</i>                                      | <i>h- Ism1::ura4<sup>+</sup> ade6-M210 leu1-32 ura4-D18</i>                    | This study    |
| <i>pan2Δ</i>                                      | <i>h- pan2::kanMX ade6-? leu1-32</i>                                           | This study    |
| <i>pan3Δ</i>                                      | <i>h- pan3::ura4<sup>+</sup> ade6-? leu1-32 ura4-D18</i>                       | This study    |
| <i>parnΔ</i>                                      | <i>h- parn::hygB<sup>R</sup> ade6-? leu1-32</i>                                | This study    |
| <i>ski2Δ</i>                                      | <i>h- ski2::ura4<sup>+</sup> ade6-? leu1-32 ura4-D18</i>                       | A. Stevenson  |
| YSP002                                            | <i>h- ccr4::kanMX ade6-M216 leu1-32 ura4-D18</i>                               | <sup>33</sup> |
| YSP003                                            | <i>h- pan2::kanMX ade6-M216 leu1-32 ura4-D18</i>                               | <sup>33</sup> |
| YSP004                                            | <i>h+ parn::hygB<sup>R</sup> ade6-M216 leu1-32 ura4-D18</i>                    | <sup>33</sup> |
| W303-1A                                           | <i>MATa leu2-3,112 trp1-1 can1-100 ura3-1 ade2-1 his3-11,15</i>                | N. Proudfoot  |
